# Supplementary material for: Prebiotic Effects of Partially Hydrolyzed Guar Gum on the Composition and Function of the Human Microbiota—Results from the PAGODA Trial
Source: PubMed Central journal article supplement (PMC7281958; doi:10.3390/nu12051257), 2020-04-28
Supplement: nutrients-12-01257-s001.pdf [file nutrients-12-01257-s001.pdf]

*Article*

# Prebiotic Effects of PHGG on the Composition and Function of the Human Microbiome – Results from the PAGODA Trial

Simon J Reider <sup>1,2</sup>, Simon Moosmang <sup>3</sup>, Judith Tragust <sup>1</sup>, Lovro Trgovec-Greif <sup>4</sup>, Simon Tragust <sup>5</sup>, Lorenz Perschy <sup>4</sup>, Nicole Przysiecki <sup>1,2</sup>, Sonja Sturm <sup>3</sup>, Herbert Tilg <sup>2</sup>, Hermann Stuppner <sup>3</sup>, Thomas Rattei <sup>4</sup>, and Alexander R Moschen <sup>1,2,\*</sup>

<sup>1</sup> Christian Doppler Laboratory for Mucosal Immunology, Medical University Innsbruck, Innsbruck, Austria

<sup>2</sup> Department of Internal Medicine I, Gastroenterology, Hepatology, Endocrinology & Metabolism, Medical University Innsbruck, Innsbruck, Austria

<sup>3</sup> Institute of Pharmacy/Pharmacognosy & Center for Molecular Biosciences Innsbruck, Leopold-Franzens Universität, Innsbruck, Austria

<sup>4</sup> Division of Computational Systems Biology, Department of Microbiology, University of Vienna, Vienna, Austria

<sup>5</sup> General Zoology / Institute of Biology, University Halle, Halle/Saale, Germany.

\* Correspondence: alexander.moschen@i-med.ac.at

## Supplementary Information

**Table S1.** Primer sequences

| Primer | Primer sequence (5' -> 3') | Primer length (bp) | Amplicon size | Region |
|--------|----------------------------|--------------------|---------------|--------|
| 8F-YM  | AGAGTTTGATYMTGGCTCAG       | 20                 | 510 bp        | V1-V3  |
| 517R   | ATTACCGCGGCTGCTGG          | 17                 |               |        |
| 341F   | CCTACGGGNGGCWGCAG          | 17                 | 464 bp        | V3-V4  |
| 805R   | GACTACHVGGGTATCTAATCC      | 21                 |               |        |

**Table S2.** Baseline laboratory test results and medical data

|                               | Sex    | Mean   | Std.Dev. | Minimum | Maximum |
|-------------------------------|--------|--------|----------|---------|---------|
| <b>Age</b>                    | male   | 30.38  | 7.42     | 23      | 44      |
|                               | female | 26     | 6.88     | 20      | 46      |
| <b>BMI [kg/m<sup>2</sup>]</b> | male   | 23.56  | 2.13     | 21.22   | 27.17   |
|                               | female | 20.4   | 1.86     | 17.78   | 23.45   |
| <b>WHR</b>                    | male   | 0.79   | 0.06     | 0.7     | 0.84    |
|                               | female | 0.73   | 0.07     | 0.57    | 0.84    |
| <b>WBC [G/L]</b>              | male   | 5.03   | 0.82     | 4.1     | 6.3     |
|                               | female | 5.13   | 0.78     | 4       | 6.7     |
| <b>Platelets [G/l]</b>        | male   | 230.5  | 42.53    | 184     | 312     |
|                               | female | 226.45 | 28.94    | 183     | 284     |
| <b>Hemoglobin [g/L]</b>       | male   | 154.12 | 7.18     | 143     | 167     |
|                               | female | 132.45 | 7.63     | 124     | 150     |
| <b>CRP [μmol/L]</b>           | male   | 0.05   | 0.08     | 0       | 0.19    |
|                               | female | 0.03   | 0.07     | 0       | 0.24    |
| <b>Calprotectin [μg/g]</b>    | male   | 13.91  | 16.11    | 0       | 39.6    |
|                               | female | 7.67   | 25.45    | 0       | 84.4    |

BMI = Body Mass Index, WHR = Waist Hip Ratio; WBC = White blood cell count;  
CRP = C-reactive protein; Std.Dev. = Standard deviation

**Table S3.** Intestinal wellbeing and symptoms during the study

|                            | Sex    | Baseline<br>(Wk 1-3) | Wk 4               | Wk 5               | Wk 6               | Wk 7               | Wk8                | Wk9                |
|----------------------------|--------|----------------------|--------------------|--------------------|--------------------|--------------------|--------------------|--------------------|
| Appetite Decrease          | male   | 1<br>(+/- 0)         | 1<br>(+/- 0)       | 1<br>(+/- 0)       | 1<br>(+/- 0)       | 1<br>(+/- 0)       | 1<br>(+/- 0)       | 1<br>(+/- 0)       |
|                            | female | 1.18<br>(+/- 0.53)   | 1.18<br>(+/- 0.4)  | 1.18<br>(+/- 0.4)  | 1.09<br>(+/- 0.3)  | 1.18<br>(+/- 0.6)  | 1.18<br>(+/- 0.6)  | 1.09<br>(+/- 0.3)  |
| Appetite Increase          | male   | 1<br>(+/- 0)         | 1<br>(+/- 0)       | 1<br>(+/- 0)       | 1.12<br>(+/- 0.35) | 1.12<br>(+/- 0.35) | 1.38<br>(+/- 0.74) | 1.25<br>(+/- 0.46) |
|                            | female | 1.24<br>(+/- 0.61)   | 1.18<br>(+/- 0.6)  | 1.27<br>(+/- 0.47) | 1.36<br>(+/- 0.67) | 1.09<br>(+/- 0.3)  | 1.09<br>(+/- 0.3)  | 1.18<br>(+/- 0.6)  |
| Bristol Stool Scale        | male   | 3.27<br>(+/- 0.97)   | 3.7<br>(+/- 0.59)  | 4.11<br>(+/- 0.77) | 3.92<br>(+/- 1.26) | 3.6<br>(+/- 1.15)  | 3.54<br>(+/- 0.69) | 3.27<br>(+/- 0.79) |
|                            | female | 3.64<br>(+/- 1.08)   | 3.71<br>(+/- 0.91) | 3.54<br>(+/- 0.71) | 3.52<br>(+/- 0.81) | 3.72<br>(+/- 0.77) | 3.33<br>(+/- 0.88) | 3.4<br>(+/- 0.78)  |
| Stool Frequency<br>[n/day] | male   | 1.11<br>(+/- 0.37)   | 1.33<br>(+/- 0.54) | 1.34<br>(+/- 0.56) | 1.48<br>(+/- 0.61) | 1.32<br>(+/- 0.48) | 1.21<br>(+/- 0.46) | 1.23<br>(+/- 0.45) |
|                            | female | 1.15<br>(+/- 0.53)   | 1.17<br>(+/- 0.53) | 1.14<br>(+/- 0.34) | 1.24<br>(+/- 0.35) | 1.23<br>(+/- 0.4)  | 1.12<br>(+/- 0.37) | 1.19<br>(+/- 0.42) |
| Diarrhoea                  | male   | 1.38<br>(+/- 0.77)   | 1.38<br>(+/- 0.52) | 1.38<br>(+/- 0.74) | 1.5<br>(+/- 0.93)  | 1.25<br>(+/- 0.71) | 1.12<br>(+/- 0.35) | 1.12<br>(+/- 0.35) |
|                            | female | 1.3<br>(+/- 0.64)    | 1.18<br>(+/- 0.4)  | 1.18<br>(+/- 0.4)  | 1.18<br>(+/- 0.4)  | 1.18<br>(+/- 0.4)  | 1<br>(+/- 0)       | 1.36<br>(+/- 0.81) |
| Flatulation                | male   | 1.71<br>(+/- 0.69)   | 2.12<br>(+/- 1.13) | 2.75<br>(+/- 0.71) | 2.38<br>(+/- 1.19) | 1.88<br>(+/- 0.83) | 1.88<br>(+/- 0.99) | 1.75<br>(+/- 0.89) |
|                            | female | 1.82<br>(+/- 0.73)   | 2.55<br>(+/- 1.04) | 2.55<br>(+/- 0.82) | 2.27<br>(+/- 1.1)  | 1.45<br>(+/- 0.69) | 1.36<br>(+/- 0.5)  | 1.27<br>(+/- 0.47) |

|                 |        |                    |                    |                    |                    |                    |                    |                    |
|-----------------|--------|--------------------|--------------------|--------------------|--------------------|--------------------|--------------------|--------------------|
| Nausea          | male   | 1.21<br>(+/- 0.66) | 1.25<br>(+/- 0.71) | 1.5<br>(+/- 0.76)  | 1.25<br>(+/- 0.46) | 1.25<br>(+/- 0.46) | 1.25<br>(+/- 0.46) | 1.25<br>(+/- 0.46) |
|                 | female | 1.06<br>(+/- 0.24) | 1.09<br>(+/- 0.3)  | 1<br>(+/- 0)       | 1.09<br>(+/- 0.3)  | 1<br>(+/- 0)       | 1<br>(+/- 0)       | 1.09<br>(+/- 0.3)  |
| Obstipation     | male   | 1.04<br>(+/- 0.2)  | 1.12<br>(+/- 0.35) | 1.25<br>(+/- 0.46) | 1.12<br>(+/- 0.35) | 1.25<br>(+/- 0.71) | 1.25<br>(+/- 0.71) | 1.12<br>(+/- 0.35) |
|                 | female | 1.15<br>(+/- 0.36) | 1.18<br>(+/- 0.4)  | 1.18<br>(+/- 0.4)  | 1.27<br>(+/- 0.65) | 1.09<br>(+/- 0.3)  | 1.36<br>(+/- 0.5)  | 1.27<br>(+/- 0.65) |
| Pain            | male   | 1.33<br>(+/- 0.7)  | 1.5<br>(+/- 0.53)  | 1.5<br>(+/- 0.76)  | 1.38<br>(+/- 0.74) | 1.25<br>(+/- 0.46) | 1.12<br>(+/- 0.35) | 1.25<br>(+/- 0.46) |
|                 | female | 1.42<br>(+/- 0.66) | 1.36<br>(+/- 0.67) | 1.64<br>(+/- 0.81) | 1.45<br>(+/- 0.82) | 1<br>(+/- 0)       | 1.36<br>(+/- 0.67) | 1.09<br>(+/- 0.3)  |
| Quality of life | male   | 6.58<br>(+/- 0.5)  | 6.12<br>(+/- 0.64) | 6.25<br>(+/- 0.89) | 6.75<br>(+/- 0.46) | 6.75<br>(+/- 0.46) | 6.5<br>(+/- 0.76)  | 6.5<br>(+/- 0.53)  |
|                 | female | 6.18<br>(+/- 0.88) | 6.27<br>(+/- 0.79) | 6.09<br>(+/- 0.83) | 6.45<br>(+/- 0.82) | 6.45<br>(+/- 0.69) | 6.73<br>(+/- 0.65) | 6.64<br>(+/- 0.5)  |

Symptoms were quantified using a questionnaire with a graduation (possible answers) of never (1), occasionally (2) or regularly (3). Values in this table represent mean and standard deviation. Stool frequency was quantified in number per day and quality of life was ranked from 0 to 9 (with 9 being the highest quality possible).

**Table S4.** Comorbidities in study participants

|                         | female | male |
|-------------------------|--------|------|
| Hypothyreosis           | 3      | 0    |
| Asthma                  | 1      | 0    |
| Migraine                | 4      | 0    |
| Lactose intolerance     | 0      | 1    |
| History of appendectomy | 1      | 0    |
| Pollen allergy          | 4      | 2    |
| Nut allergy             | 1      | 0    |

Number of participants suffering from the listed comorbidities. Other than these conditions, participants were healthy.

**Table S5.** Lifestyle Factors in study participants

|         | Never       | Occasionally | Regularly   |
|---------|-------------|--------------|-------------|
| Smoking | 18 (94.7 %) | 0 (0 %)      | 1 (5.3 %)   |
| Alcohol | 2 (20.5 %)  | 16 (84.2 %)  | 1 (5.3 %)   |
| Sports  | 1 (5.3 %)   | 7 (36.8 %)   | 11 (57.9 %) |

**Table S6.** Shift values of reference peaks used for manual assignment of peak identities in NMR data

| <b>Metabolite name</b> | <b>Shift Value</b> |
|------------------------|--------------------|
| Acetate                | 1.9241             |
| Propionate CH3         | 1.047              |
| Propionate CH3         | 1.0598             |
| Propionate CH3         | 1.0725             |
| Propionate CH2         | 2.1673             |
| Propionate CH2         | 2.1801             |
| Propionate CH2         | 2.1929             |
| Propionate CH2         | 2.2057             |
| Butyrate CH3           | 0.88616            |
| Butyrate CH3           | 0.89861            |
| Butyrate CH3           | 0.91106            |
| Butyrate CH2b          | 1.5311             |
| Butyrate CH2b          | 1.5432             |
| Butyrate CH2b          | 1.5557             |
| Butyrate CH2b          | 1.5678             |
| Butyrate CH2b          | 1.5802             |
| Butyrate CH2b          | 1.5927             |
| Butyrate CH2a          | 2.1495             |
| Butyrate CH2a          | 2.1616             |
| Butyrate CH2a          | 2.174              |
| Galactose              | 5.2706             |
| Galactose              | 5.2729             |
| Mannose                | 5.1942             |
| Mannose                | 5.1915             |
| PHGG                   | 5.04               |

## Supplementary Figure 1

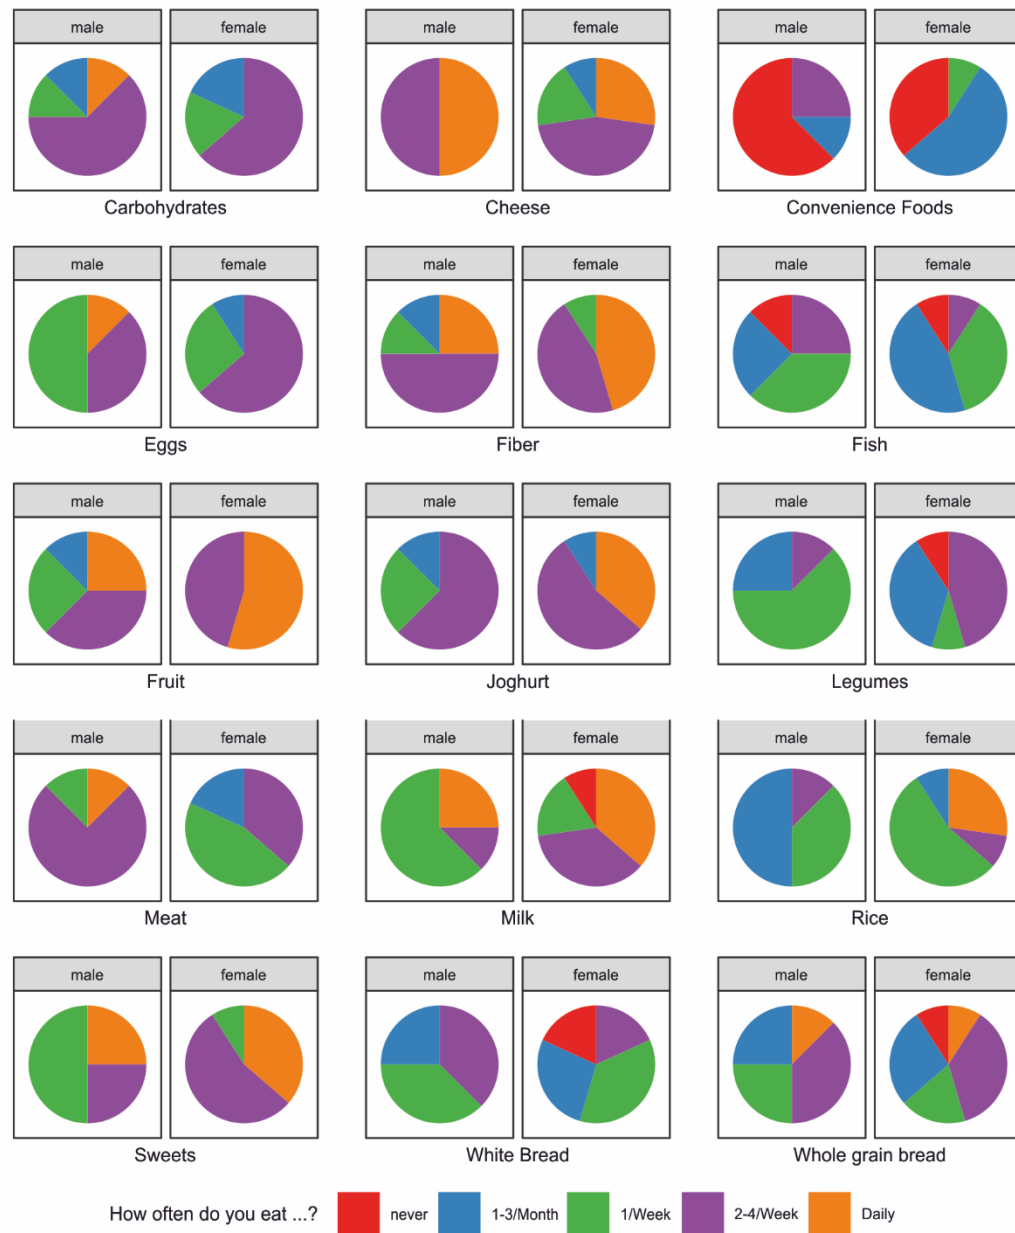

**Figure S1.** Baseline eating habits by gender. Female participants reported a higher consumption of fiber and fruit and less intake of red meat.



## Supplementary Figure 2

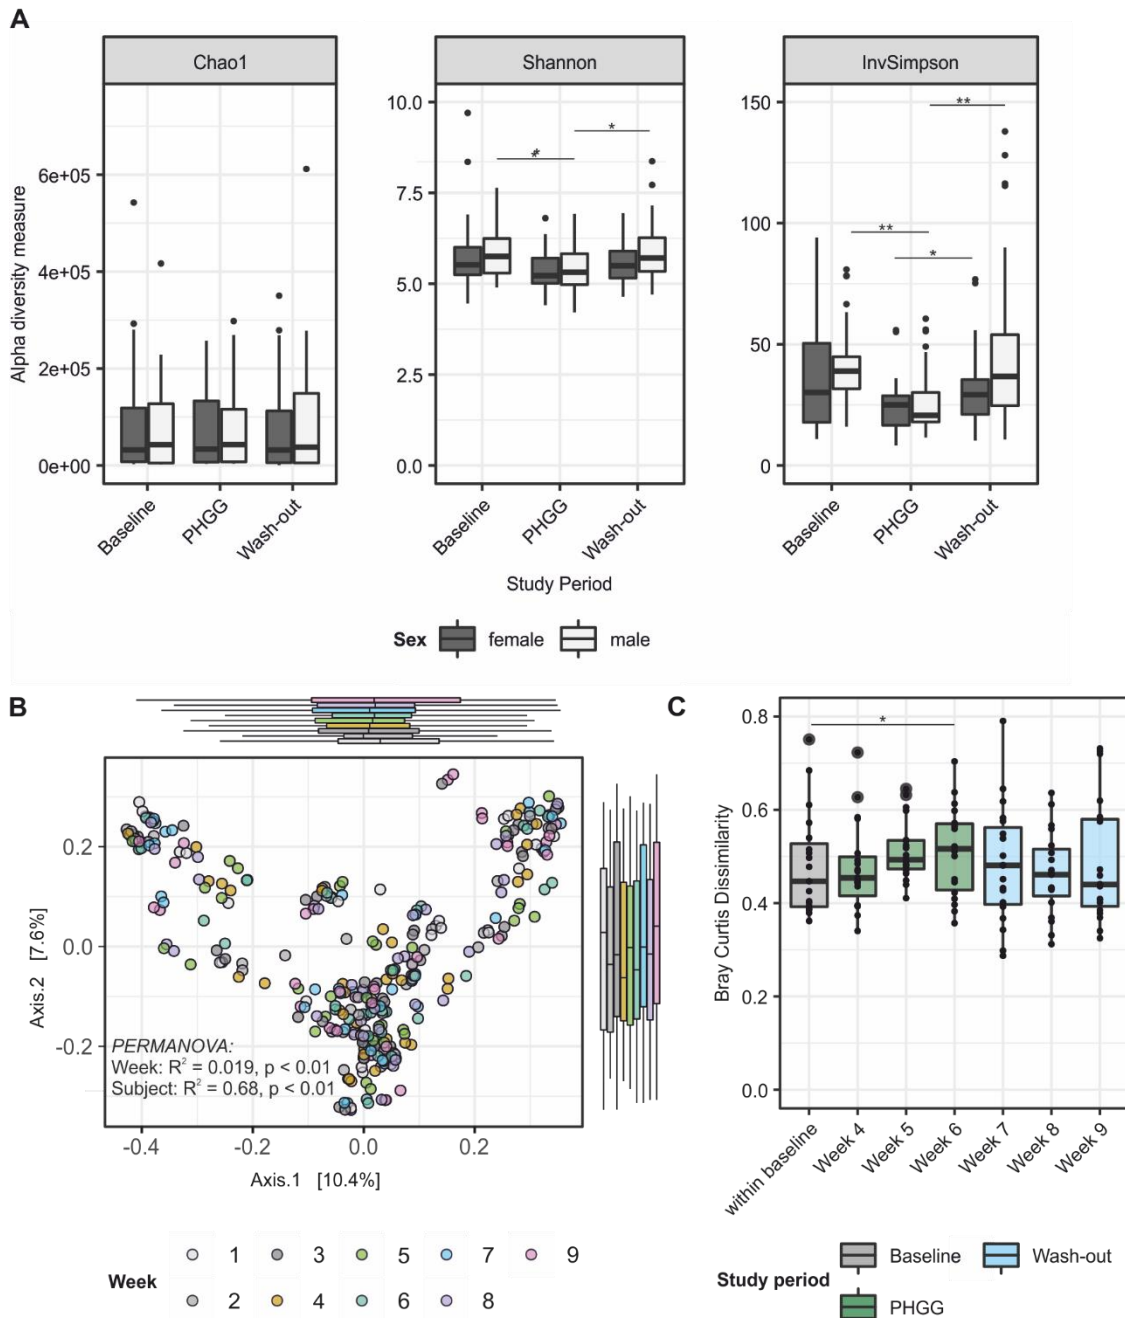

**Figure S2.** Results of V1-V3 region 16S sequencing corresponding to Figure 2. **(A)**  $\alpha$ -diversity decreases during intervention in both sexes but returns to baseline values during the washout period (pairwise Wilcoxon test); **(B)** In a principle component analysis of microbial composition over time, study week (i.e. PHGG supplementation status) was identified as a significant determinant (PERMANOVA permutational analysis of variance); **(C)** Pairwise analysis of Bray-Curtis dissimilarity over time: Community composition becomes significantly more dissimilar by week 6 than expected during steady state (Wilcoxon test). After the intervention period, the microbiota returns to its baseline state. PHGG = partially hydrolyzed guar gum; \* $p < 0.05$ , \*\* $p < 0.01$ .

## Supplementary Figure 3

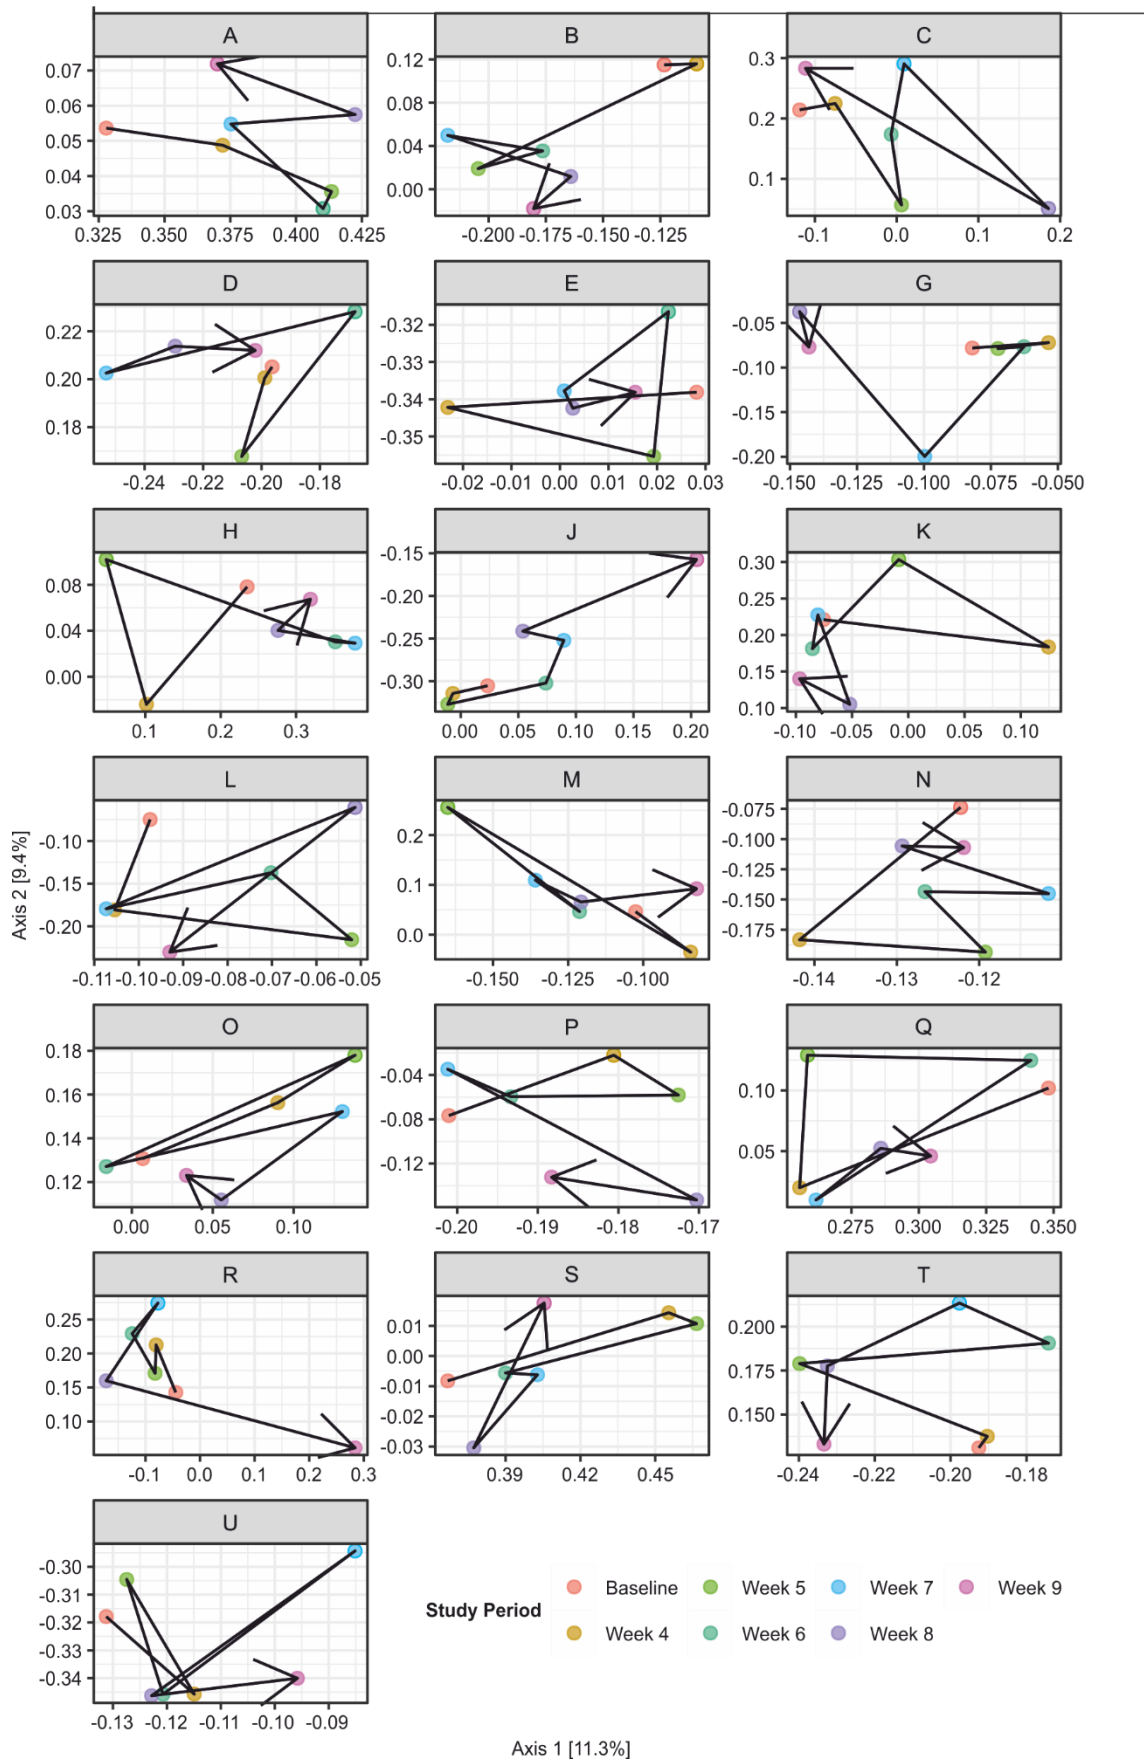

**Figure S3.** Individual trajectories of microbiome reconstitution. Primary coordinate analysis of Bray-Curtis dissimilarities over time; V3-V4 region.

## Supplementary Figure 4

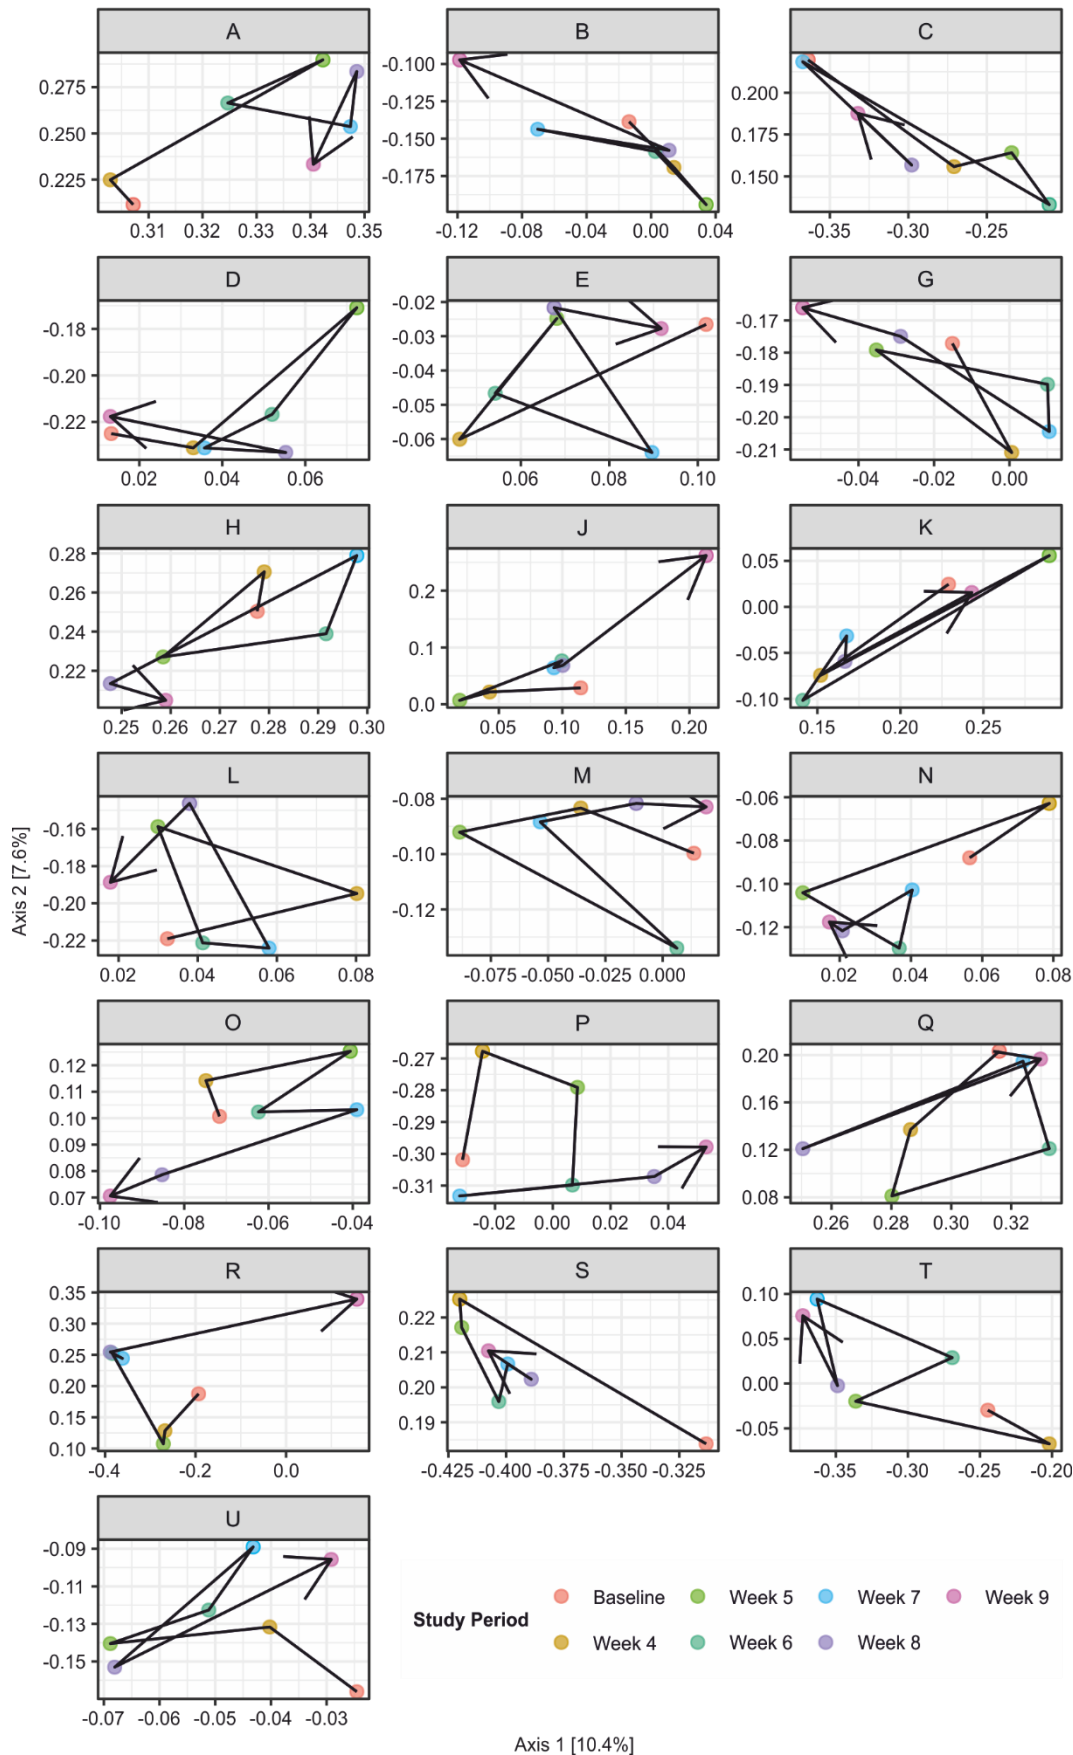

**Figure S4.** Individual trajectories of microbiome reconstitution. Primary coordinate analysis of Bray-Curtis dissimilarities over time; V3-V4 region.

## Supplementary Figure 5

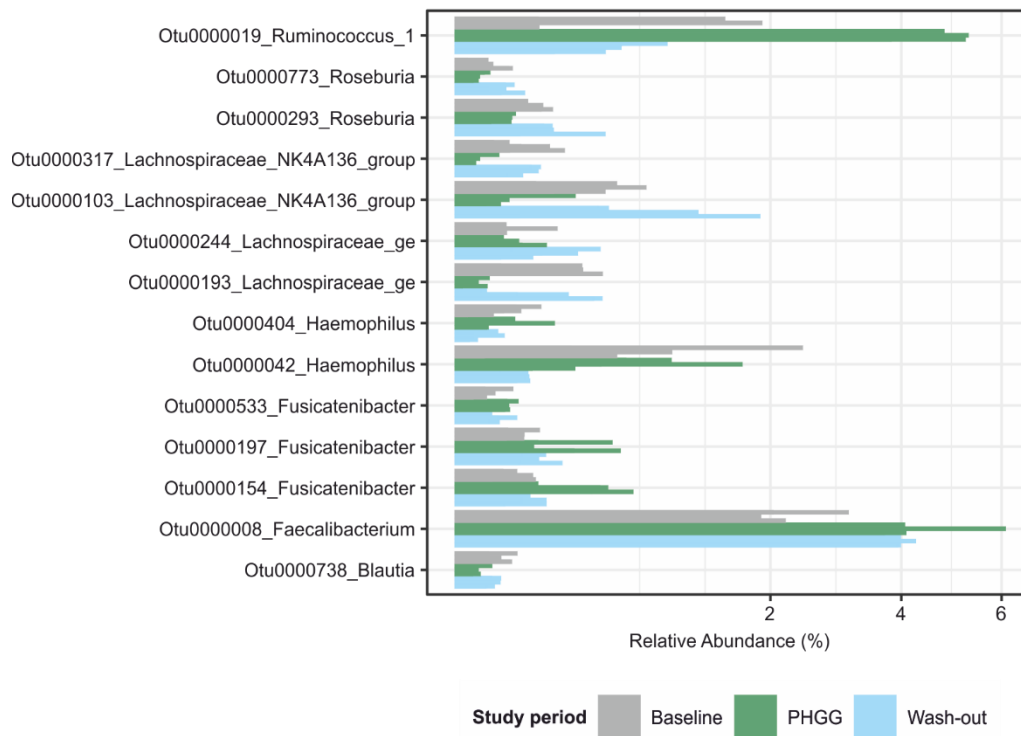

**Figure S5.** Differentially abundant OTUs in the V1-V3 dataset and their mapping on the genus level. Testing was done using a negative binomial model implemented in DESeq2 and a cutoff of 0.01 for the adjusted p-value. OTU = operational taxonomic unit; UCG = unknown classification group, PHGG = partially hydrolyzed guar gum.

## Supplementary Figure 6

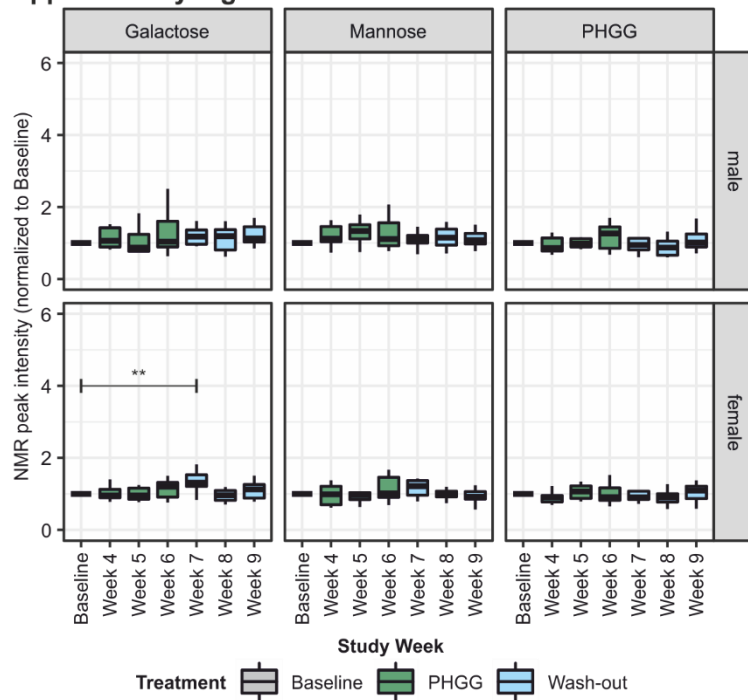

**Figure S6.** Targeted analysis of NMR spectra for levels of PHGG and its associated metabolites galactose and mannose. Values from the first 3 weeks of the study were averaged („Baseline“). (PHGG = partially hydrolyzed guar gum; Statistics: pairwise Wilcoxon tests between baseline and week 4 – week 8; Bonferroni-corrected; \* $p < 0.05$ , \*\* $p < 0.01$  ).
